# Supplementary material for: Study on the change of global ecological distribution of Nicotiana tabacum L. based on MaxEnt model
Source: PubMed Central journal article supplement (PMC11292735; doi:10.3389/fpls.2024.1371998), 2024-07-17
Supplement: DataSheet_1.pdf [file DataSheet_1.pdf]

## *Supplementary Material*

### Supplementary Tables

Table S1 The twenty-two environment variables used for the calculation of the  
MaxEnt model

| Type of variable | Environment variables | Description                         |
|------------------|-----------------------|-------------------------------------|
| Bioclimatic      | bio2                  | Mean Diurnal Temperature Range      |
|                  | bio8                  | Mean Temperature of Wettest Quarter |
|                  | bio10                 | Mean Temperature of Warmest Quarter |
|                  | bio12                 | Annual Precipitation                |
|                  | bio15                 | Precipitation Seasonality           |
|                  | bio17                 | Precipitation of Driest Quarter     |
| Topographic      | DEM                   | Digital Elevation Model             |
|                  | Slope                 | Slope Gradient                      |
|                  | Aspect                | The Direction of the Slope Faces    |
| Solar Radiation  | Srad9                 | Solar Radiation in September        |
|                  | CEC_EFF               | Cation Exchange Capacity Efficiency |
| Soil             | COARSE                | Soil Sand Thickness                 |
|                  | CLAY                  | Clay Content                        |
|                  | ROOT_DEPTH            | Root Soil Depth                     |
|                  | SILT                  | Silt Content                        |
|                  | ALUM_SAT              | Aluminum Saturation                 |
|                  | CEC_CLAY              | Cation Exchange Capacity of Clay    |
|                  | CEC_SOIL              | Cation Exchange Capacity of Soil    |
|                  | ELEC_COND             | Electrical Conductivity             |
|                  | CN_RATIO              | Carbon Nitrogen Ratio               |
|                  | TCARBON               | Calcium Carbonate Content           |
|                  | SAND                  | Sand Content                        |

Table S2 Contribution of environment variables to the construction of the MaxEnt model

| Variables  | Percent contribution/% | Permutation importance/% |
|------------|------------------------|--------------------------|
| bio10      | 28.9                   | 34.3                     |
| bio12      | 28.8                   | 16.4                     |
| Srad9      | 7.9                    | 14.2                     |
| ELEC_COND  | 7.6                    | 0.3                      |
| bio2       | 5.7                    | 3.8                      |
| bio17      | 4.6                    | 4.6                      |
| TCARBON    | 4.4                    | 8.5                      |
| Slope      | 2.8                    | 4.5                      |
| bio15      | 1.6                    | 1.5                      |
| bio8       | 1.3                    | 2.9                      |
| ROOT_DEPTH | 1.2                    | 0.4                      |
| ALUM_SAT   | 1.2                    | 1.8                      |
| DEM        | 0.9                    | 1.8                      |
| CEC_CLAY   | 0.7                    | 0.7                      |
| SILT       | 0.6                    | 0.9                      |
| SAND       | 0.5                    | 0.8                      |
| CEC_EFF    | 0.5                    | 0.8                      |
| CEC_SOIL   | 0.4                    | 0.7                      |
| CLAY       | 0.2                    | 0.9                      |
| COARSE     | 0.1                    | 0.3                      |
| Aspect     | 0                      | 0                        |
| CN_RATIO   | 0                      | 0.1                      |

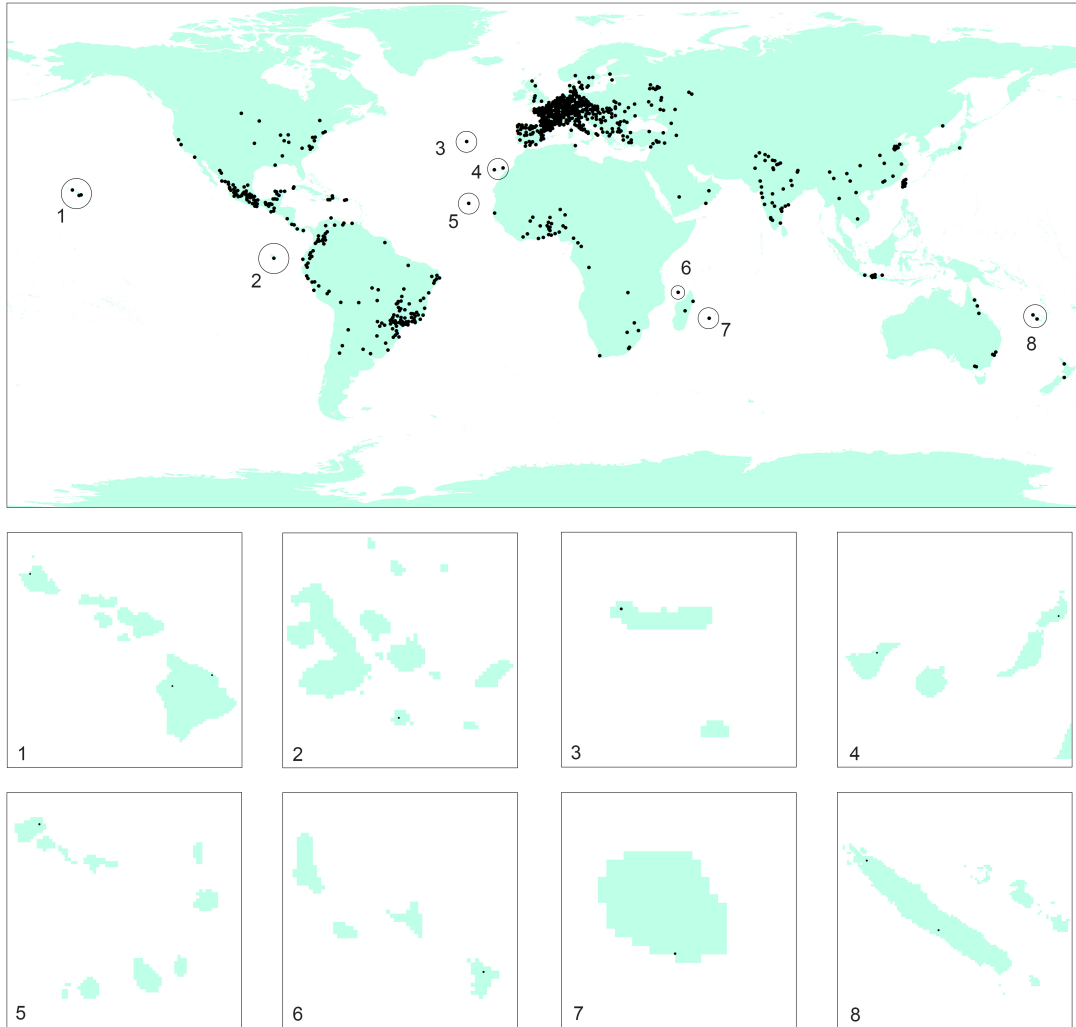

Figure S1. Sample records of the global distribution of *Nicotiana tabacum* L.. Black dots represent the 777 sample records of *Nicotiana tabacum* L. used for the final calculation of the MaxEnt model. The map was directly obtained from WorldClim (<https://worldclim.org>) and processed with ArcMap 10.8.

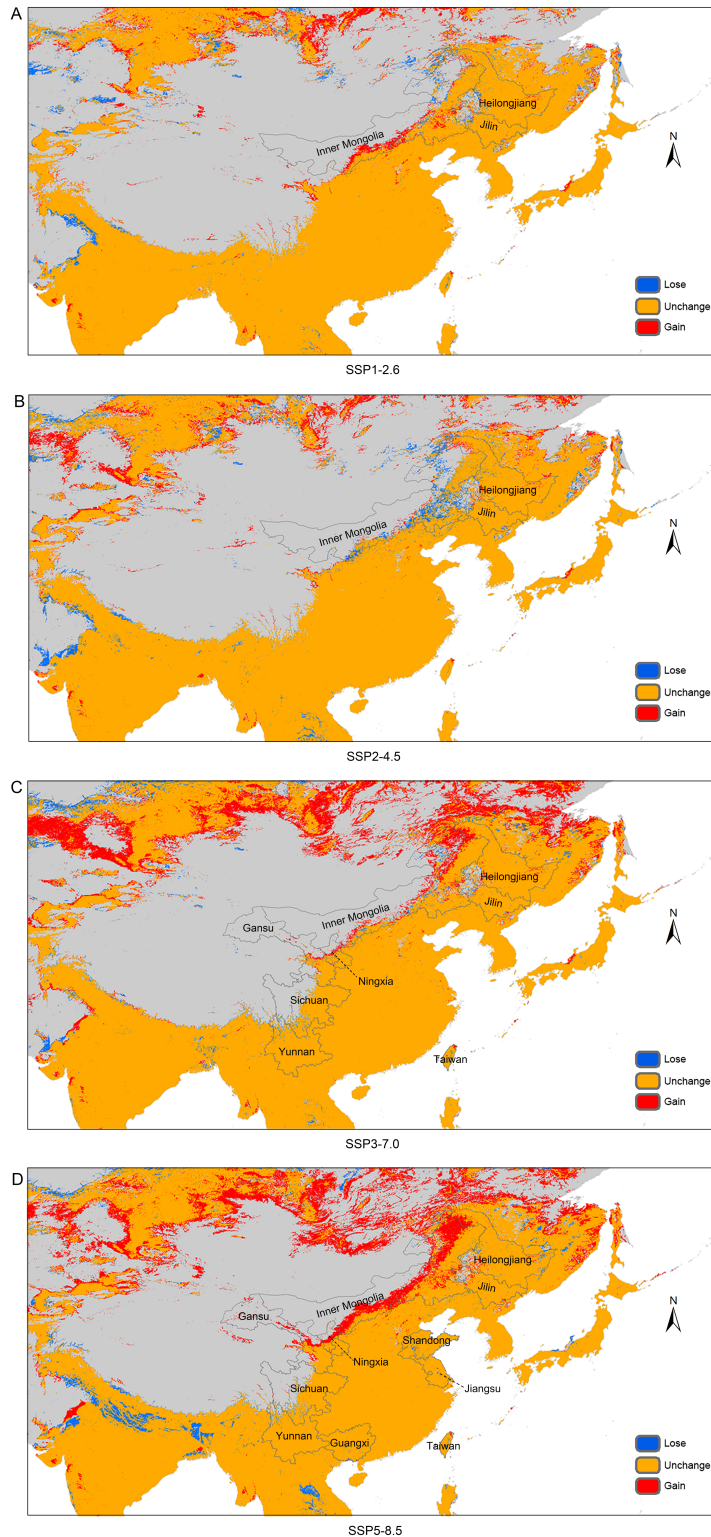

Figure S2 Change of ecological distribution of *Nicotiana tabacum* L. under four future climate scenarios in China. (A) Ecological distribution change under SSP1-2.6 climate scenario. (B) Ecological distribution change under SSP2-4.5 climate scenario. (C) Ecological distribution change under SSP3.7-0 climate scenario. (D) Ecological distribution change under SSP5-8.5 climate scenario.

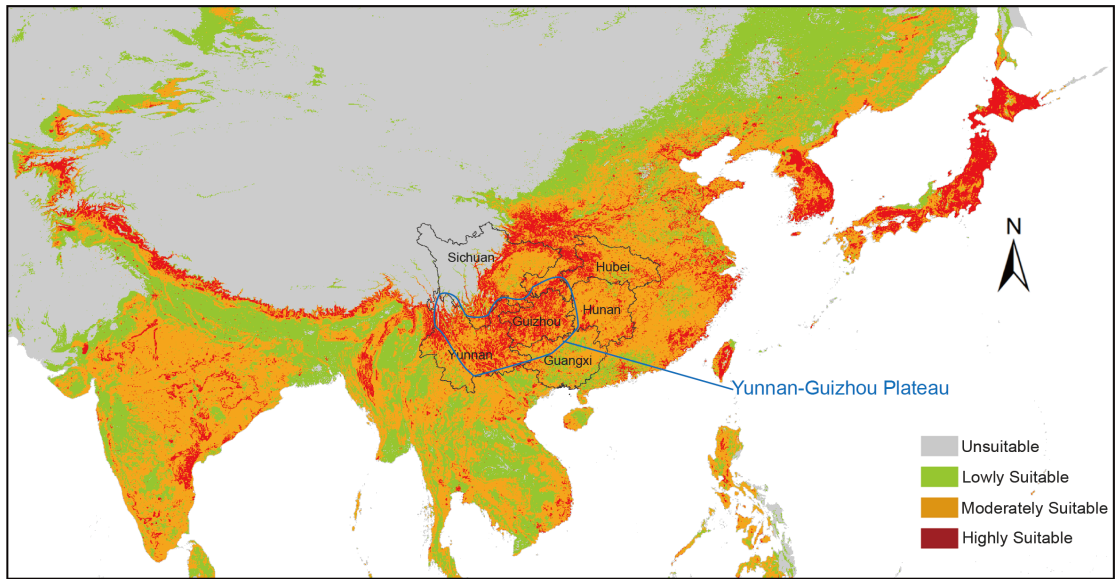

Figure S3 Suitable habitats of *Nicotiana tabacum* L. on the Yunnan-Guizhou Plateau, China, under current climate conditions.
